# Supplementary material for: Restricted accessed nanoparticles for direct magnetic solid phase extraction of trace metal ions from human fluids followed by inductively coupled plasma mass spectrometry detection
Source: Royal Society of Chemistry journal article supplement (doi:10.1039/c5an00385g), 2015-01-01
Supplement: c5an00385g1.pdf [file c5an00385g1.pdf]

# Restricted accessed nanoparticles for direct magnetic solid phase extraction of trace metal ions from human fluids followed by inductively coupled plasma mass spectrometry detection

Ping Yan, Man He, Beibei Chen, Bin Hu\*

Key Laboratory of Analytical Chemistry for Biology and Medicine (Ministry of Education), Department of Chemistry, Wuhan University, Wuhan 430072, China

\*Corresponding author. Tel: 0086-27-68752162; Fax: 0086-27-68754067; Email: [binhu@whu.edu.cn](mailto:binhu@whu.edu.cn)

## Supplemental Materials

**Fig. S1.** (a) Nitrogen adsorption-desorption isotherms. (b) Pore size distribution of prepared restricted accessed  $\text{Fe}_3\text{O}_4@\text{SiO}_2@\text{PAR}$ .

**Fig. S2.** Magnetic hysteresis loops of  $\text{Fe}_3\text{O}_4$  and restricted accessed  $\text{Fe}_3\text{O}_4@\text{SiO}_2@\text{PAR}$ .

**Fig. S3.** Effect of the pH on the extraction of metal ions on  $\text{Fe}_3\text{O}_4@\text{SiO}_2@\text{PAR}$ . Conditions: materials, 10 mg; sample volume, 5 mL;  $C_{\text{Cr, Cd, La, Nd, Pb}}$ ,  $10 \mu\text{g L}^{-1}$ ; extraction time, 20 min.

**Fig. S4.** Effect of concentration of  $\text{HNO}_3$  on the recovery of metal ions. Conditions: materials, 10 mg; sample volume, 5 mL;  $C_{\text{Cr, Cd, La, Nd, Pb}}$ ,  $10 \mu\text{g L}^{-1}$ ; extraction time, 20 min; elution time, 20 min.

**Fig. S5.** Effect of volume of eluent on the recovery of metal ions. Conditions: materials, 10 mg; sample volume, 5 mL;  $C_{\text{Cr, Cd, La, Nd, Pb}}$ ,  $10 \mu\text{g L}^{-1}$ ; extraction time, 20 min; elution time, 20 min.

**Fig. S6.** Effect of sample volume on the recovery of metal ions. Conditions: materials, 10 mg;  $M_{Cr, Cd, La, Nd, Pb}$ , 50 ng; elution volume, 500  $\mu\text{L}$ ; extraction time, 20 min; elution time, 20 min.

**Fig. S7.** Matrix effect of serum (a) and urine (b) on MSPE-ICP-MS procedure.

Sample volume, 10 mL; Eluent, 2 mol  $\text{L}^{-1}$   $\text{HNO}_3$ . The signal intensities of La and Pb refer to the right Y axis, and the other ions refer to the left Y axis. The spiked concentration of each target ions in the original serum and urine sample are 40  $\text{ng mL}^{-1}$  and 20  $\text{ng mL}^{-1}$ , respectively.

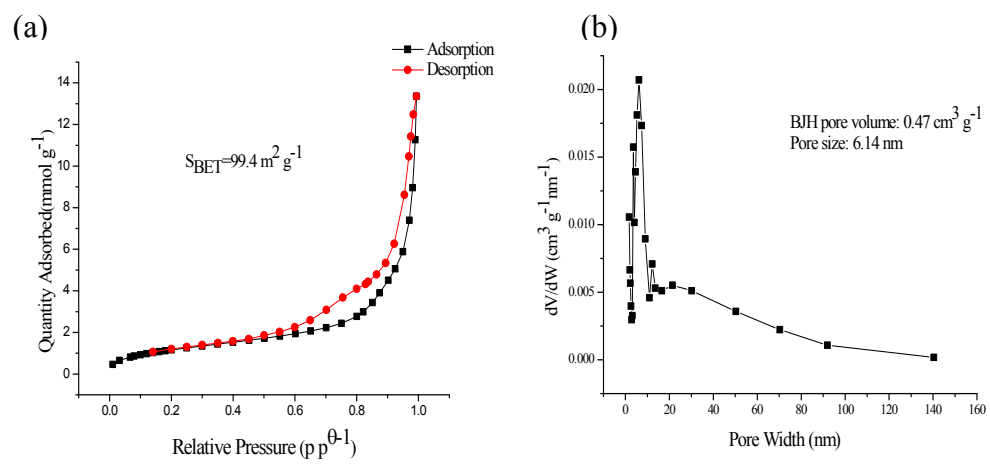

Fig. S1.

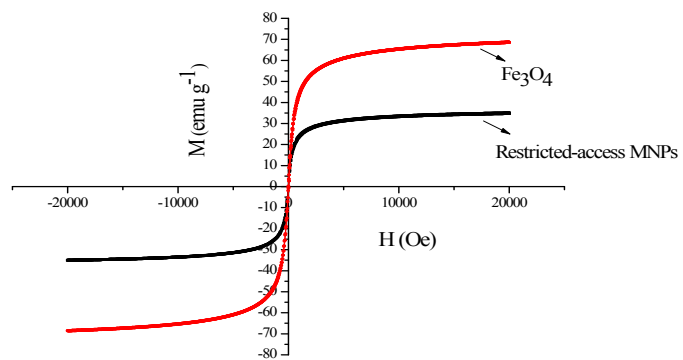

Fig. S2.

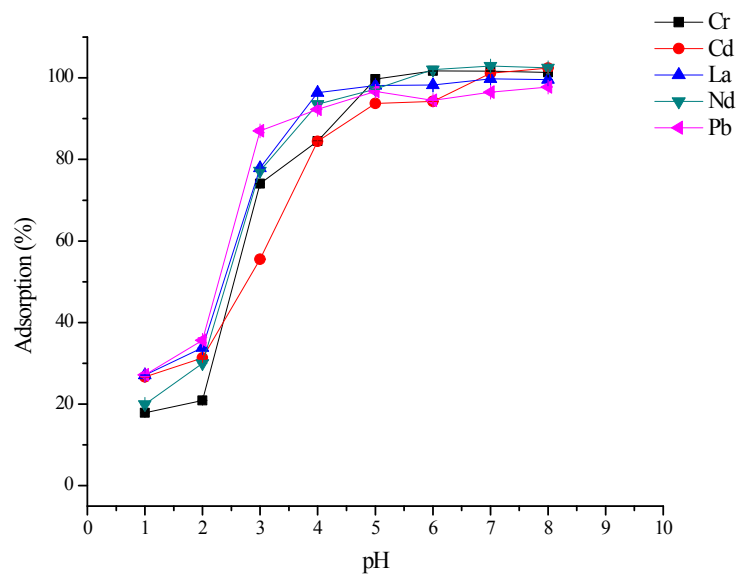

Fig. S3

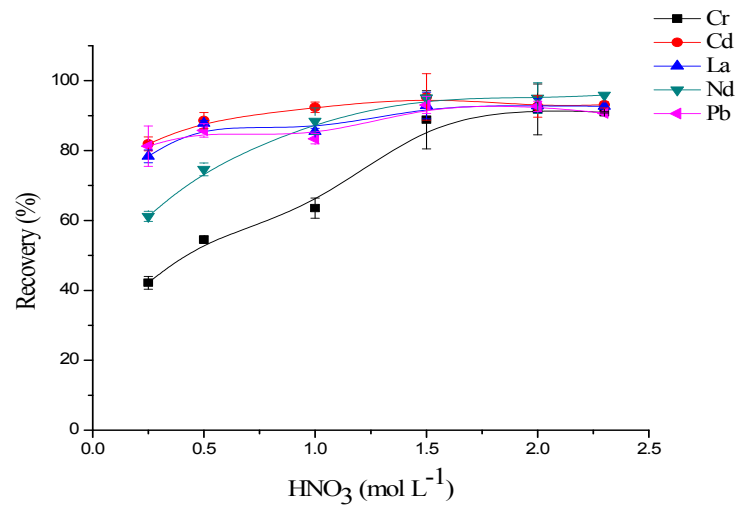

Fig. S4.

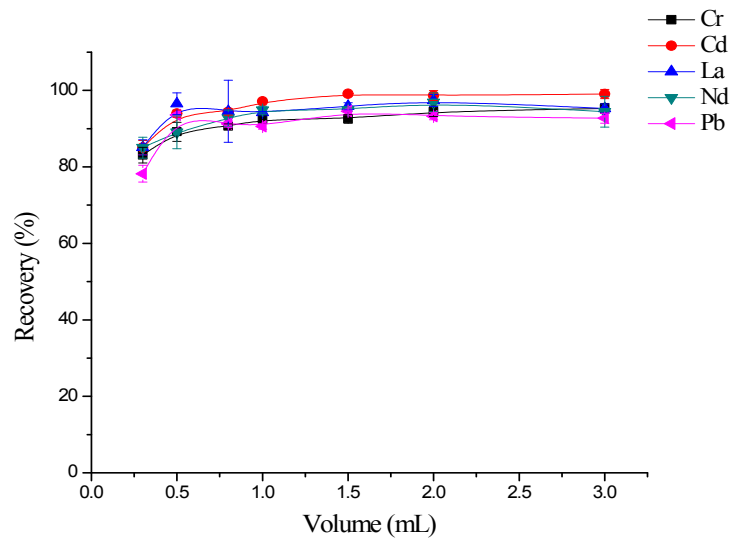

Fig. S5.

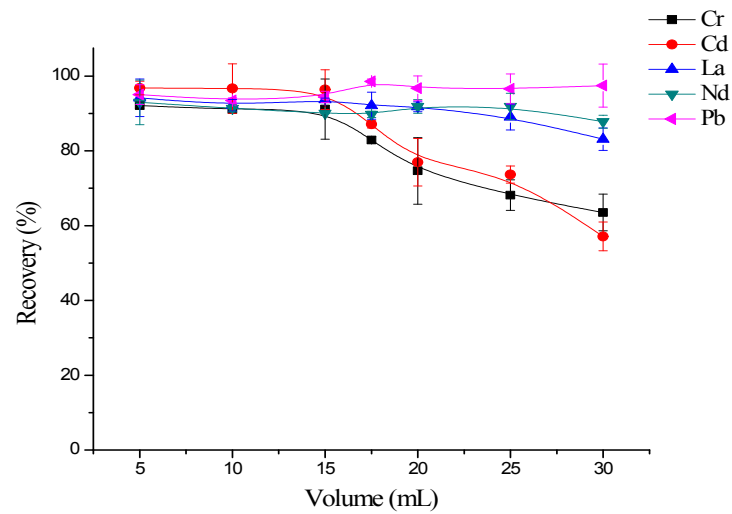

**Fig. S6.**

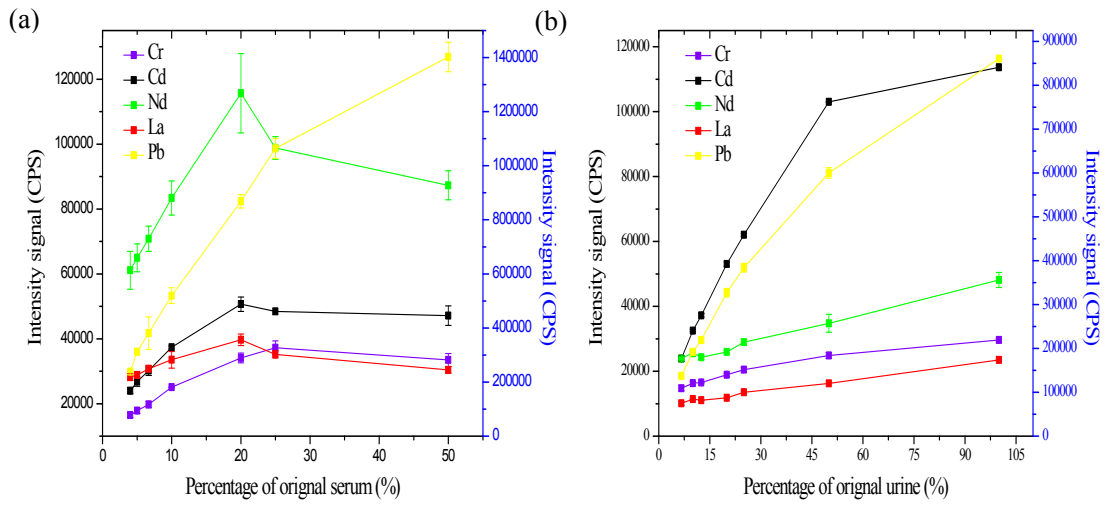

**Fig. S7.**
